# Supplementary material for: Upper rim site lipophilic calix[4]arenes as receptors for natural terpenes and functionally related solvent molecules: combined crystal structure and QMB sensor study
Source: Royal Society of Chemistry journal article supplement (doi:10.1039/c0ce00696c), 2010-11-16
Supplement: c0ce00696c.pdf [file c0ce00696c.pdf]

## **Electronic Supplementary Information (ESI)**

**Table S1** Torsion angles ( $^{\circ}$ ) of the alkanoyl chains

**Table S2** Distances and angles of hydrogen bond type contacts.

**Fig. S1** Packing arrangement of the calixarene molecules in the complex of **1**·with (-)-menthone (**1a**) viewed from the crystallographic *a*, *b* and *c* axes, respectively. The two crystallographically independent calixarene molecules are indicated by different colours.

**Fig. S2** Packing arrangement of the calixarene molecules in the complex of **1**·with (-)-menthol (**1b**) viewed from the crystallographic *a*, *b* and *c* axes, respectively. The two crystallographically independent calixarene molecules are indicated by different colours.

**Fig. S3** Packing arrangement of the calixarene molecules in the complex of **2**·with (-)-menthone (**2a**) viewed from the crystallographic *a*, *b* and *c* axes, respectively. The two crystallographically independent calixarene molecules are indicated by different colours.

**Fig. S4** Packing arrangement of the calixarene molecules in the complex of **2**·with (+)-carvone (**2b**) viewed from the crystallographic *a*, *b* and *c* axes, respectively. The two crystallographically independent calixarene molecules are indicated by different colours.

**Fig. S5** Packing arrangement of the calixarene molecules in the complex of **3**·with (+)-carvone (**3a**) viewed from the crystallographic *a*, *b* and *c* axes, respectively. The two crystallographically independent calixarene molecules are indicated by different colours.

**Fig. S6** Packing arrangement of the calixarene molecules in the complex of **3** with *n*-butanol (**3b**) viewed from the crystallographic *a*, *b* and *c* axes, respectively. The space group is the centrosymmetric  $P2_1/n$  and there is one complex molecule in the asymmetric unit only.

**Table S1.**

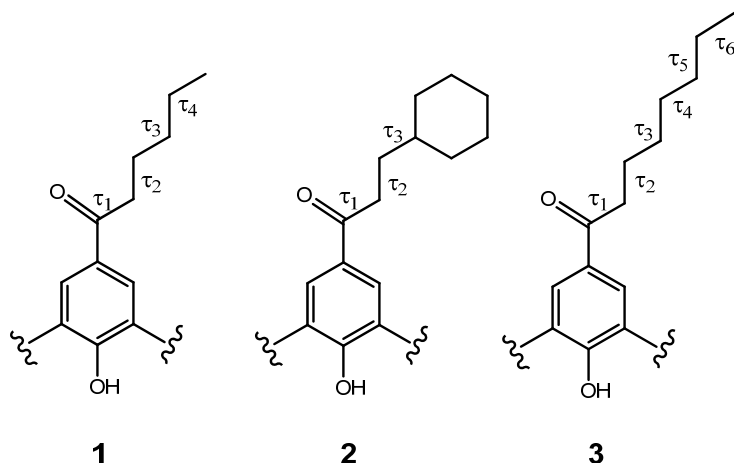

|           | $\tau_1$ |          | $\tau_2$ |          | $\tau_3$ |          | $\tau_4$ |          | $\tau_5$ |          | $\tau_6$ |          |
|-----------|----------|----------|----------|----------|----------|----------|----------|----------|----------|----------|----------|----------|
|           | <i>A</i> | <i>B</i> |
| <b>1a</b> |          |          |          |          |          |          |          |          |          |          |          |          |
| branch 1  | -173.1   | 74.2     | 80.2     | 63.0     | 80.4     | -176.8   | -170.6   | -177.4   |          |          |          |          |
| branch 2  | -178.8   | 179.3    | 178.7    | -175.3   | -165.1   | 79.5     | 176.1    | 168.0    |          |          |          |          |
| branch 3  | -168.9   | -179.2   | 175.4    | -176.9   | 169.8    | -174.8   | -174.8   | 179.2    |          |          |          |          |
| branch 4  | -75.1    | 178.5    | -165.2   | -74.9    | -176.1   | 176.8    | -172.4   | -176.7   |          |          |          |          |
| <b>1b</b> |          |          |          |          |          |          |          |          |          |          |          |          |
| branch 1  | -170.2   | 73.3     | 72.3     | 65.4     | 74.4     | -176.0   | 70.7     | -177.4   |          |          |          |          |
| branch 2  | 173.1    | 176.1    | 171.9    | -162.7   | -75.7    | 166.7    | -166.1   | 178.0    |          |          |          |          |
| branch 3  | -175.3   | -174.2   | 177.4    | -176.3   | 179.9    | -170.8   | 179.9    | 170.8    |          |          |          |          |
| branch 4  | -79.9    | 166.8    | -163.8   | -170.9   | -177.5   | 77.2     | -172.1   | 163.2    |          |          |          |          |
| <b>2a</b> |          |          |          |          |          |          |          |          |          |          |          |          |
| branch 1  | 165.5    | -167.1   | -72.0    | 71.5     | -59.5    | 60.0     | -167.6   | 166.7    | -170.2   | 171.0    | -60.0    | 58.5     |
| branch 2  | 72.5     | -72.0    | 161.5    | -163.3   | -179.3   | 179.5    | 174.9    | -174.9   | -175.6   | 175.4    | -176.2   | 174.8    |
| branch 3  | 177.4    | -178.2   | -179.9   | 178.2    | -176.6   | 177.8    | 171.8    | -172.5   | -178.1   | 178.3    | 179.3    | -179.4   |
| branch 4  | 176.6    | -175.4   | -167.8   | 172.7    | 176.7    | -178.3   | -178.1   | 177.2    | 171.0    | -170.9   | -171.7   | 172.0    |
| <b>2b</b> |          |          |          |          |          |          |          |          |          |          |          |          |
| branch 1  | -114.1   | 115.4    | 67.7     | -63.6    | 170.5    | -174.1   | 177.2    | -179.3   | -131.1   | 177.4    | -87.0    | -176.5   |
| branch 2  | -174.3   | -172.1   | 75.5     | -72.6    | 177.9    | -179.7   | 73.4     | -71.7    | 176.2    | 179.9    | 179.6    | -178.1   |
| branch 3  | -166.7   | 171.4    | 176.6    | -178.5   | -176.5   | 174.2    | -173.4   | 174.6    | -172.5   | 173.0    | 174.7    | -172.3   |
| branch 4  | 152.8    | -147.2   | 179.6    | 177.8    | -73.3    | 73.3     | -176.1   | 176.8    | 172.4    | -172.8   | -176.2   | 177.1    |
| <b>3a</b> |          |          |          |          |          |          |          |          |          |          |          |          |
| branch 1  | 155.0    | -149.6   | -70.7    | 79.1     | 159.5    | -171.1   |          |          |          |          |          |          |
| branch 2  | 98.9     | -105.4   | 173.7    | -177.0   | -162.3   | 161.9    |          |          |          |          |          |          |
| branch 3  | 147.4    | -156.8   | -82.7    | 74.0     | 174.5    | -166.5   |          |          |          |          |          |          |
| branch 4  | 164.9    | -161.6   | 176.3    | -171.5   | 173.0    | -172.4   |          |          |          |          |          |          |
| <b>3b</b> |          |          |          |          |          |          |          |          |          |          |          |          |
| branch 1  | -179.9   |          | -69.0    |          | 174.1    |          |          |          |          |          |          |          |
| branch 2  | 82.8     |          | 165.6    |          | 179.2    |          |          |          |          |          |          |          |
| branch 3  | 73.0     |          | -179.0   |          | 179.7    |          |          |          |          |          |          |          |
| branch 4  | 150.8    |          | 161.5    |          | 152.7    |          |          |          |          |          |          |          |

**Table S2.**

| Atoms involved        | Symmetry           | Distances (Å) |       | Angles (°) |
|-----------------------|--------------------|---------------|-------|------------|
|                       |                    | D...A         | H...A | D-H...A    |
| <b>1a</b>             |                    |               |       |            |
| O(1)-H(1)···O(4)      | $x, y, z$          | 2.726(4)      | 1.90  | 166.6      |
| O(2)-H(2)···O(1)      | $x, y, z$          | 2.670(4)      | 1.86  | 162.1      |
| O(3)-H(3)···O(2)      | $x, y, z$          | 2.655(4)      | 1.85  | 161.1      |
| O(4)-H(4)···O(3)      | $x, y, z$          | 2.667(4)      | 1.83  | 171.8      |
| C(24A)-H(24)···O(5)   | $-x, -0.5+y, 2-z$  | 3.356(4)      | 2.47  | 155.2      |
| C(3A)-H(3A2)···O(6)   | $-x, -0.5+y, 1-z$  | 3.393(4)      | 2.50  | 157.0      |
| C(7A)-H(7C)···O(7)    | $1-x, -0.5+y, 1-z$ | 3.364(4)      | 2.51  | 144.1      |
| C(10A)-H(10A)···O(7)  | $1-x, -0.5+y, 1-z$ | 3.293(4)      | 2.43  | 150.6      |
| C(17A)-H(17A)···O(8)  | $1-x, -0.5+y, 2-z$ | 3.304(4)      | 2.44  | 151.7      |
| C(14A)-H(14A)···O(8)  | $1-x, -0.5+y, 2-z$ | 3.402(4)      | 2.55  | 144.2      |
| O(1A)-H(1A)···O(4A)   | $x, y, z$          | 2.739(4)      | 2.06  | 137.3      |
| O(2A)-H(2A)···O(1A)   | $x, y, z$          | 2.709(4)      | 1.90  | 160.1      |
| O(3A)-H(3A)···O(2A)   | $x, y, z$          | 2.670(4)      | 1.84  | 172.1      |
| O(4A)-H(4A)···O(3A)   | $x, y, z$          | 2.672(4)      | 1.86  | 161.2      |
| C(24)-H(24)···O(5A)   | $1-x, 0.5+y, 1-z$  | 3.386(4)      | 2.47  | 156.7      |
| C(19)-H(19)···O(5A)   | $1-x, 0.5+y, 1-z$  | 3.568(4)      | 2.68  | 155.8      |
| C(3)-H(3A1)···O(6A)   | $1-x, 0.5+y, 2-z$  | 3.302(4)      | 2.38  | 162.2      |
| C(5)-H(5)···O(7A)     | $-x, 0.5+y, 2-z$   | 3.421(4)      | 2.55  | 152.0      |
| C(10)-H(10)···O(7A)   | $-x, 0.5+y, 2-z$   | 3.239(4)      | 2.36  | 153.2      |
| C(14)-H(14A)···O(8A)  | $-x, 0.5+y, 1-z$   | 3.386(4)      | 2.55  | 144.5      |
| C(17)-H(17A)···O(8A)  | $-x, 0.5+y, 1-z$   | 3.298(4)      | 2.44  | 149.8      |
| <b>1b</b>             |                    |               |       |            |
| O(1)-H(1)···O(4)      | $x, y, z$          | 2.723(4)      | 1.89  | 170.5      |
| O(2)-H(2)···O(1)      | $x, y, z$          | 2.709(4)      | 1.99  | 142.5      |
| O(3)-H(3)···O(2)      | $x, y, z$          | 2.676(4)      | 1.85  | 167.6      |
| O(4)-H(4)···O(3)      | $x, y, z$          | 2.682(4)      | 1.83  | 177.8      |
| O(1A)-H(1A)···O(3)    | $x, y, z$          | 2.196(4)      | 2.58  | 130.8      |
| O(1H)-H(1H)···O(5)    | $x, y, z$          | 3.187(4)      | 2.41  | 154.2      |
| C(36)-H(36B)···O(1H)  | $x, y, z$          | 3.371(4)      | 2.43  | 158.7      |
| C(21A)-H(21C)···O(5)  | $-x, -0.5+y, -z$   | 3.495(5)      | 2.61  | 149.4      |
| C(3A)-H(3C)···O(6)    | $-x, -0.5+y, 1-z$  | 3.313(5)      | 2.41  | 157.6      |
| C(7A)-H(7C)···O(7)    | $1-x, -0.5+y, 1-z$ | 3.415(5)      | 2.54  | 147.8      |
| C(10A)-H(10A)···O(7)  | $1-x, -0.5+y, 1-z$ | 3.354(4)      | 2.50  | 149.7      |
| C(17A)-H(17A)···O(8)  | $1-x, -0.5+y, -z$  | 3.306(5)      | 2.42  | 154.7      |
| O(1A)-H(1A)···O(4A)   | $x, y, z$          | 2.744(4)      | 2.03  | 142.6      |
| O(2A)-H(2A)···O(1A)   | $x, y, z$          | 2.691(4)      | 1.86  | 168.7      |
| O(3A)-H(3A)···O(2A)   | $x, y, z$          | 2.675(4)      | 1.86  | 162.4      |
| O(4A)-H(4A)···O(3A)   | $x, y, z$          | 2.680(4)      | 1.85  | 171.4      |
| C(21)-H(21B)···O(5A)  | $1+x, 0.5+y, 1-z$  | 3.501(5)      | 2.65  | 144.3      |
| C(24)-H(24)···O(5A)   | $1-x, 0.5+y, 1-z$  | 3.337(4)      | 2.46  | 152.6      |
| C(3)-H(3B)···O(6A)    | $1-x, 0.5+y, -z$   | 3.314(4)      | 2.39  | 163.3      |
| O(1G)-H(1G)···O(7A)   | $x, y, z$          | 3.138(4)      | 2.32  | 161.5      |
| C(17)-H(17)···O(8A)   | $-x, 0.5+y, 1-z$   | 3.339(5)      | 2.48  | 149.9      |
| C(14)-H(14B)···O(8A)  | $-x, 0.5+y, 1-z$   | 3.473(5)      | 2.60  | 146.8      |
| <b>2a</b>             |                    |               |       |            |
| O(1)-H(1)···O(2)      | $x, y, z$          | 2.722(5)      | 1.95  | 152.1      |
| O(2)-H(2)···O(3)      | $x, y, z$          | 2.694(5)      | 1.86  | 173.5      |
| O(3)-H(3)···O(4)      | $x, y, z$          | 2.679(5)      | 1.83  | 179.5      |
| O(4)-H(4)···O(1)      | $x, y, z$          | 2.673(5)      | 1.88  | 156.3      |
| C(46A)-H(46C)···O(1G) | $x, y, z$          | 2.587(5)      | 2.59  | 122.0      |
| C(12A)-H(12A)···O(5)  | $1-x, -0.5+y, -z$  | 3.399(6)      | 2.49  | 159.9      |
| C(17A)-H(17A)···O(5)  | $1-x, -0.5+y, -z$  | 3.422(6)      | 2.52  | 159.0      |
| C(19A)-H(19A)···O(6)  | $2-x, -0.5+y, -z$  | 3.318(6)      | 2.43  | 154.9      |
| C(24A)-H(24A)···O(6)  | $2-x, -0.5+y, -z$  | 3.501(6)      | 2.61  | 156.1      |
| C(3A)-H(3A2)···O(7)   | $2-x, -0.5+y, 1-z$ | 3.428(6)      | 2.53  | 158.0      |
| C(26A)-H(26A)···O(7)  | $2-x, -0.5+y, 1-z$ | 3.399(6)      | 2.48  | 161.7      |
| C(5A)-H(5A)···O(8)    | $1-x, -0.5+y, 1-z$ | 3.367(6)      | 2.44  | 163.9      |

|                                                       |                   |          |      |       |
|-------------------------------------------------------|-------------------|----------|------|-------|
| O(1A)-H(1A)···O(2A)                                   | $x, y, z$         | 2.729(5) | 1.89 | 173.0 |
| O(2A)-H(2A)···O(3A)                                   | $x, y, z$         | 2.692(5) | 1.84 | 178.6 |
| O(3A)-H(3A)···O(4A)                                   | $x, y, z$         | 2.692(5) | 1.85 | 176.6 |
| O(4A)-H(4A)···O(1A)                                   | $x, y, z$         | 2.672(5) | 1.84 | 171.5 |
| C(54)-H(54)···O(1H)                                   | $x, y, z$         | 3.087(6) | 2.49 | 118.2 |
| C(12)-H(12)···O(5A)                                   | $2-x, 0.5+y, 1-z$ | 3.441(6) | 2.54 | 159.1 |
| C(17)-H(17)···O(5A)                                   | $2-x, 0.5+y, 1-z$ | 3.406(6) | 2.50 | 159.7 |
| C(19)-H(19)···O(6A)                                   | $1-x, 0.5+y, 1-z$ | 3.298(6) | 2.41 | 155.5 |
| C(24)-H(24)···O(6A)                                   | $1-x, 0.5+y, 1-z$ | 3.478(6) | 2.60 | 156.2 |
| C(3)-H(3A1)···O(7A)                                   | $1-x, 0.5+y, -z$  | 3.414(6) | 2.51 | 158.1 |
| C(26)-H(26)···O(7A)                                   | $1-x, 0.5+y, -z$  | 3.400(6) | 2.50 | 158.5 |
| C(5)-H(5)···O(8A)                                     | $2-x, 0.5+y, -z$  | 3.338(6) | 2.41 | 166.4 |
| C(3)-H(3B)···O(7A)                                    | $1+x, y, z$       | 3.428(6) | 2.53 | 158.0 |
| C(7H)-H(7H2)··· <i>centroid</i> (ringA) <sup>a</sup>  | $x, y, z$         | 3.599(7) | 2.76 | 143.9 |
| C(7G)-H(7G1)··· <i>centroid</i> (ringA') <sup>a</sup> | $x, y, z$         | 3.576(7) | 2.80 | 136.5 |

## 2b

|                                                        |                    |          |      |       |
|--------------------------------------------------------|--------------------|----------|------|-------|
| O(1)-H(1)···O(4)                                       | $x, y, z$          | 2.714(6) | 1.88 | 174.5 |
| O(2)-H(2)···O(1)                                       | $x, y, z$          | 2.691(6) | 1.91 | 155.4 |
| O(3)-H(3)···O(2)                                       | $x, y, z$          | 2.691(6) | 1.86 | 172.5 |
| O(4)-H(4)···O(3)                                       | $x, y, z$          | 2.686(6) | 1.84 | 174.4 |
| C(5G)-H(5G)···O(5)                                     | $x, y, z$          | 3.432(6) | 2.67 | 137.8 |
| C(17A)-H(17A)···O(5)                                   | $1-x, -0.5+y, -z$  | 3.401(6) | 2.49 | 161.6 |
| C(26A)-H(26A)···O(5)                                   | $1-x, -0.5+y, -z$  | 3.412(6) | 2.50 | 159.8 |
| C(5A)-H(5A)···O(6)                                     | $1-x, -0.5+y, 1-z$ | 3.421(6) | 2.51 | 160.8 |
| C(3A)-H(3C)···O(7)                                     | $-x, -0.5+y, 1-z$  | 3.461(6) | 2.55 | 161.5 |
| C(12A)-H(12A)···O(7)                                   | $-x, -0.5+y, 1-z$  | 3.361(6) | 2.43 | 165.0 |
| C(19A)-H(19A)···O(8)                                   | $-x, 0.5+y, 2-z$   | 3.325(6) | 2.42 | 159.3 |
| O(2)-H(2)···O(1G)                                      | $1-x, 0.5+y, 2-z$  | 2.883(6) | 2.59 | 101.9 |
| O(1A)-H(1A)···O(4A)                                    | $x, y, z$          | 2.716(6) | 1.91 | 161.1 |
| O(2A)-H(2A)···O(1A)                                    | $x, y, z$          | 2.693(6) | 1.87 | 167.9 |
| O(3A)-H(3A)···O(2A)                                    | $x, y, z$          | 2.688(6) | 1.93 | 149.4 |
| O(4A)-H(4A)···O(3A)                                    | $x, y, z$          | 2.701(6) | 1.88 | 166.8 |
| C(5H)-H(5H)···O(5A)                                    | $x, y, z$          | 3.361(6) | 2.65 | 132.6 |
| C(19)-H(19)···O(5A)                                    | $-x, 0.5+y, 1-z$   | 3.408(6) | 2.50 | 160.8 |
| C(3)-H(3B)···O(6A)                                     | $-x, 0.5+y, -z$    | 3.387(6) | 2.47 | 161.4 |
| C(17)-H(17)···O(8A)                                    | $1-x, 0.5+y, 1-z$  | 3.333(6) | 2.41 | 163.3 |
| C(5)-H(5)···O(7A)                                      | $1-x, 0.5+y, -z$   | 3.401(6) | 2.49 | 161.4 |
| C(10)-H(10)···O(7A)                                    | $1-x, 0.5+y, -z$   | 3.412(6) | 2.50 | 165.1 |
| O(2A)-H(2A)···O(1H)                                    | $x, y, z$          | 2.787(6) | 2.46 | 103.8 |
| C(52)-H(52B)··· <i>centroid</i> (ringC) <sup>a</sup>   | $1-x, -0.5+y, 1-z$ | 3.553(7) | 2.69 | 146.9 |
| C(10G)-H(10C)··· <i>centroid</i> (ringD) <sup>a</sup>  | $x, y, z$          | 3.556(6) | 2.84 | 130.4 |
| C(10H)-H(10H)··· <i>centroid</i> (ringB') <sup>a</sup> | $x, y, z$          | 3.742(6) | 2.80 | 160.1 |
| C(52A)-H(52A)··· <i>centroid</i> (ringC') <sup>a</sup> | $-x, 0.5+y, -z$    | 3.599(6) | 2.70 | 152.3 |
| C(10H)-H(10D)··· <i>centroid</i> (ringD') <sup>a</sup> | $x, y, z$          | 3.506(6) | 2.86 | 124.3 |

## 3a

|                      |                |          |      |       |
|----------------------|----------------|----------|------|-------|
| O(1)-H(1)···O(2)     | $x, y, z$      | 2.714(5) | 1.91 | 160.3 |
| O(2)-H(2)···O(3)     | $x, y, z$      | 2.677(5) | 1.86 | 166.2 |
| O(3)-H(3)···O(4)     | $x, y, z$      | 2.724(5) | 1.89 | 170.5 |
| O(4)-H(4)···O(1)     | $x, y, z$      | 2.662(5) | 1.81 | 179.1 |
| C(10A)-H(10A)···O(5) | $-1+x, y, z$   | 3.452(6) | 2.52 | 165.7 |
| C(19A)-H(19A)···O(7) | $x, y, 1+z$    | 3.365(7) | 2.48 | 158.1 |
| C(24A)-H(24A)···O(7) | $x, y, 1+z$    | 3.437(7) | 2.56 | 154.8 |
| C(12A)-H(12A)···O(8) | $-1+x, y, 1+z$ | 3.553(6) | 2.62 | 169.3 |
| C(17A)-H(17A)···O(8) | $-1+x, y, 1+z$ | 3.585(4) | 2.65 | 168.1 |
| O(1A)-H(1A)···O(4A)  | $x, y, z$      | 2.694(5) | 1.87 | 166.7 |
| O(2A)-H(2A)···O(1A)  | $x, y, z$      | 2.685(5) | 1.91 | 148.4 |
| O(3A)-H(3A)···O(2A)  | $x, y, z$      | 2.704(5) | 1.89 | 161.3 |
| O(4A)-H(4A)···O(3A)  | $x, y, z$      | 2.694(5) | 1.91 | 152.3 |
| C(3)-H(3A)···O(5A)   | $1+x, y, z$    | 3.419(6) | 2.52 | 157.6 |
| C(26)-H(26)···O(5A)  | $1+x, y, z$    | 3.536(7) | 2.65 | 153.6 |
| C(19)-H(19)···O(6A)  | $1+x, y, -1+z$ | 3.338(6) | 2.41 | 166.0 |
| C(24)-H(24)···O(6A)  | $1+x, y, -1+z$ | 3.442(6) | 2.52 | 162.9 |

|                                                       |                    |          |      |       |
|-------------------------------------------------------|--------------------|----------|------|-------|
| C(12)-H(12)···O(7A)                                   | $x, y, -1+z$       | 3.469(6) | 2.54 | 165.5 |
| C(17)-H(17)···O(7A)                                   | $x, y, -1+z$       | 3.597(6) | 2.67 | 165.5 |
| O(3)-H(3)···O(1G)                                     | $1-x, 0.5+y, 1-z$  | 2.987(6) | 2.64 | 106.4 |
| O(2A)-H(2A)···O(1H)                                   | $1-x, -0.5+y, 1-z$ | 3.010(6) | 2.66 | 105.5 |
| C(9H)-H(9H1)··· <i>centroid</i> (ringA) <sup>a</sup>  | $x, y, z$          | 3.614(6) | 2.82 | 139.0 |
| C(8H)-H(8HA)··· <i>centroid</i> (ringC) <sup>a</sup>  | $x, y, z$          | 3.882(6) | 2.93 | 175.2 |
| C(8G)-H(8GA)··· <i>centroid</i> (ringA') <sup>a</sup> | $x, y, z$          | 3.782(6) | 2.92 | 151.1 |
| C(9G)-H(9G2)··· <i>centroid</i> (ringC') <sup>a</sup> | $x, y, z$          | 3.659(6) | 2.80 | 147.0 |

### 3b

|                    |                         |          |      |       |
|--------------------|-------------------------|----------|------|-------|
| O(1)-H(1)···O(2)   | $x, y, z$               | 2.728(3) | 1.93 | 157.1 |
| O(2)-H(2)···O(3)   | $x, y, z$               | 2.686(3) | 1.85 | 172.4 |
| O(3)-H(3)···O(4)   | $x, y, z$               | 2.709(3) | 1.90 | 162.4 |
| O(4)-H(4)···O(1)   | $x, y, z$               | 2.691(3) | 1.87 | 166.2 |
| O(1G)-H(1G)···O(5) | $x, y, z$               | 3.065(3) | 2.36 | 141.4 |
| C(12)-H(12)···O(5) | $0.5+x, 0.5-y, -0.5+z$  | 3.532(3) | 2.60 | 168.7 |
| C(24)-H(24)···O(6) | $-0.5+x, 0.5-y, -0.5+z$ | 3.371(3) | 2.47 | 159.2 |
| C(19)-H(19)···O(6) | $-0.5+x, 0.5-y, -0.5+z$ | 3.206(3) | 2.29 | 161.9 |
| C(3)-H(3A)···O(7)  | $-0.5+x, 0.5-y, 0.5+z$  | 3.425(3) | 2.51 | 162.7 |
| C(26)-H(26)···O(7) | $-0.5+x, 0.5-y, 0.5+z$  | 3.351(3) | 2.43 | 164.6 |
| C(5)-H(5)···O(8)   | $0.5+x, 0.5-y, 0.5+z$   | 3.544(3) | 2.60 | 173.0 |

<sup>a</sup> ring A: C(1)...C(6); ring C: C(15)...C(20); ring D: C(22)...C(27); ring A': C(1A)...C(6A); ring B': C(8A)...C(13A); ring C': C(15A)...C(20A); ring D': C(22A)...C(27A); ring B'': C(8B)...C(13B); ring D'': C(22B)...C(27B).

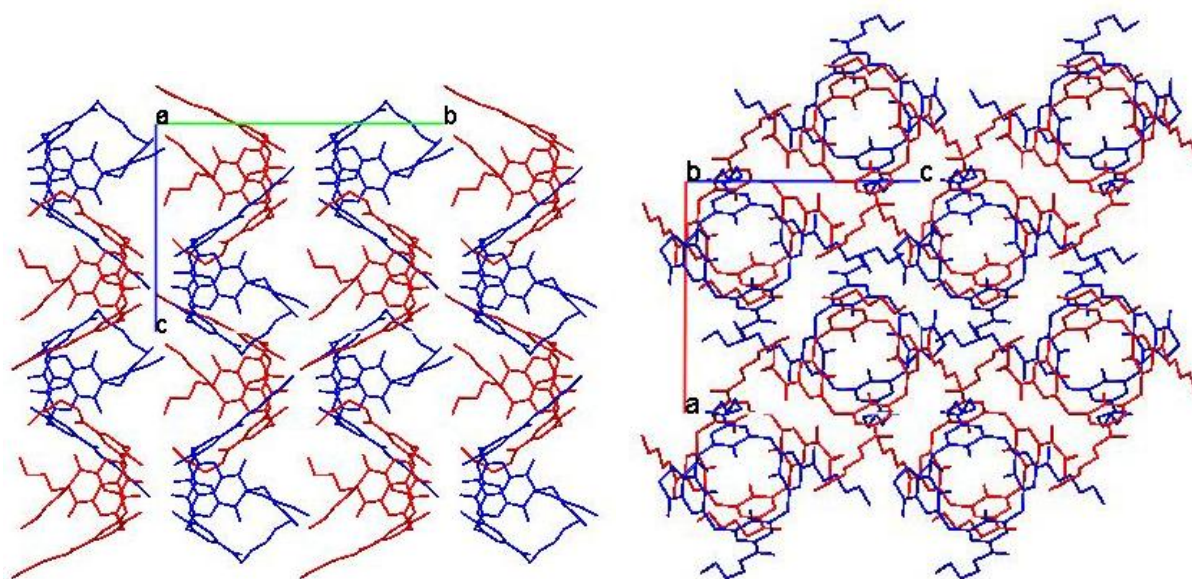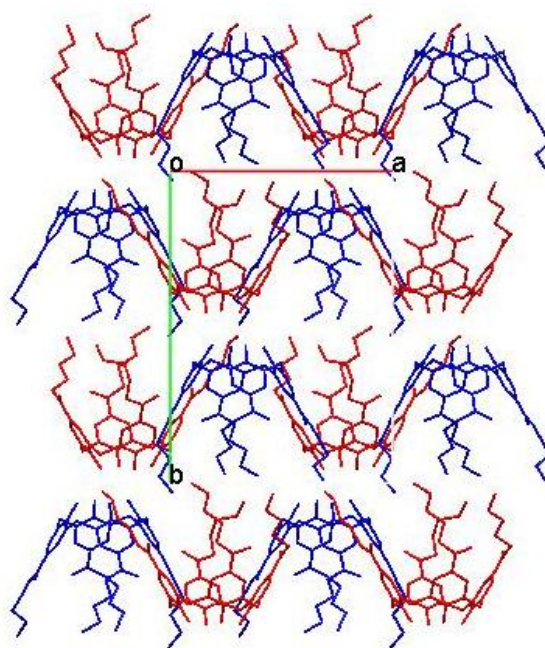

**Fig. S1**

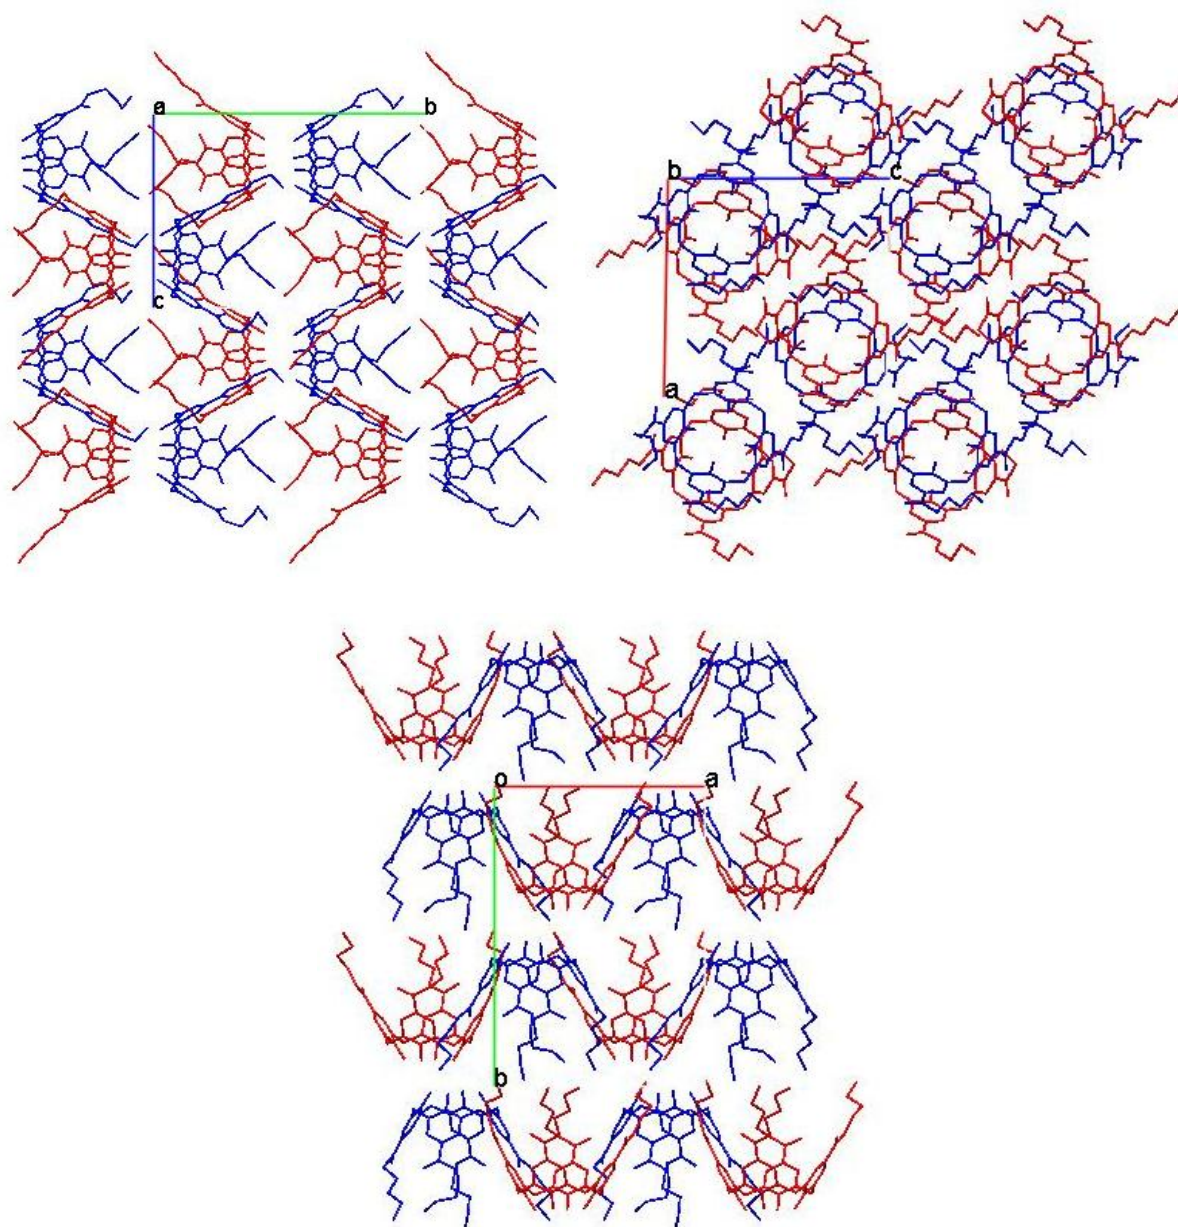

**Fig. S2**



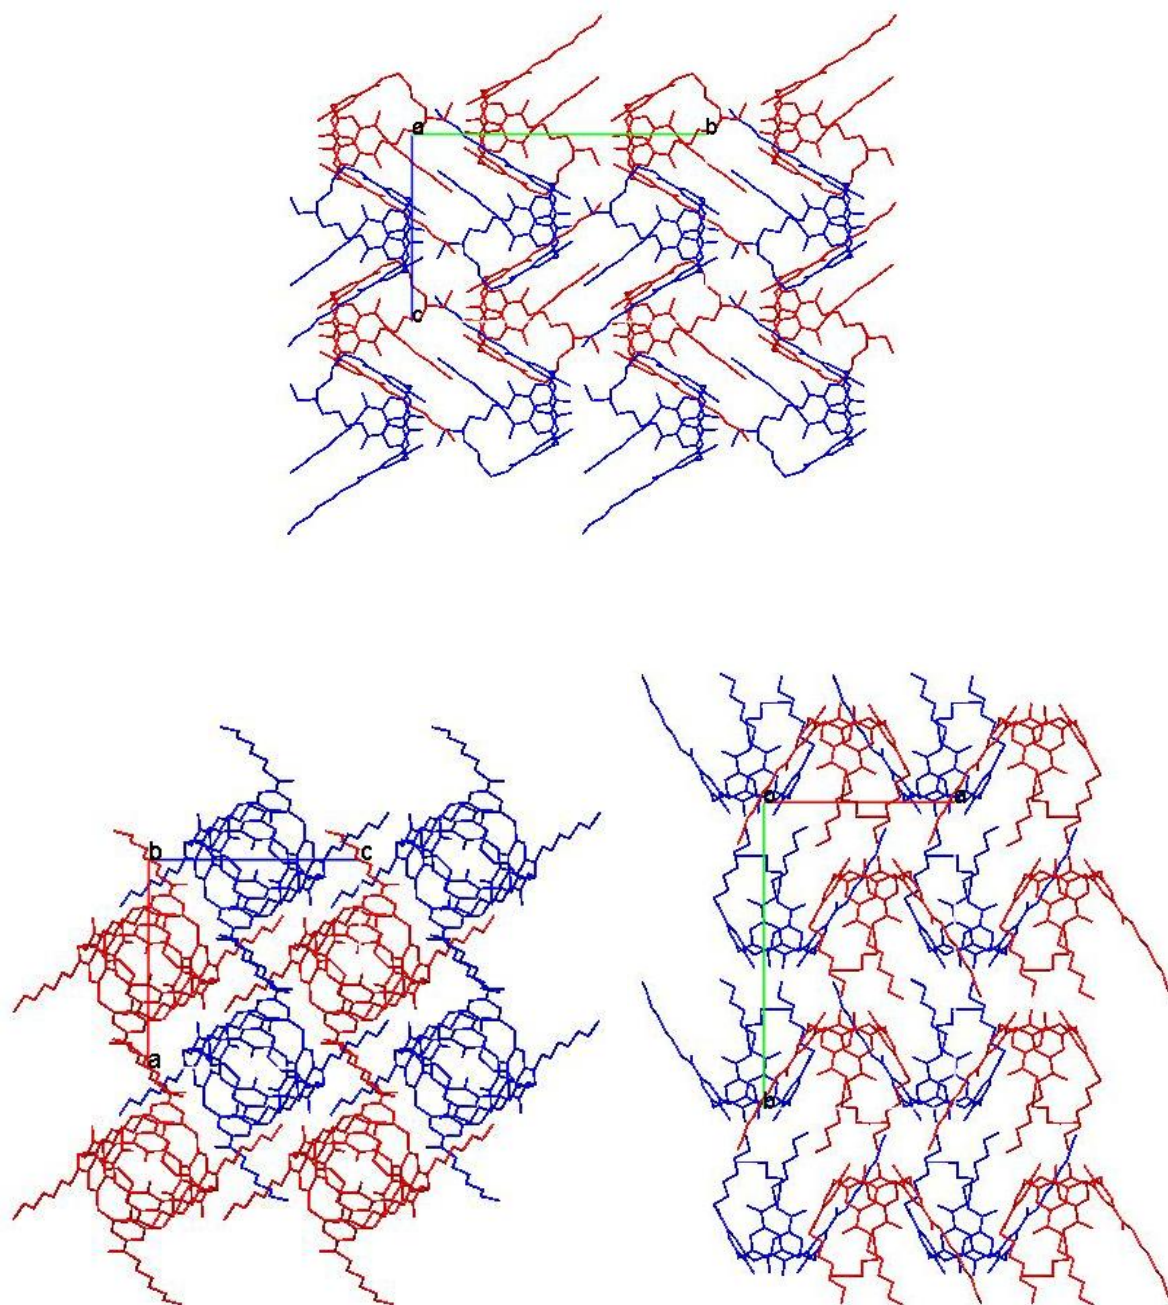

**Fig. S3**

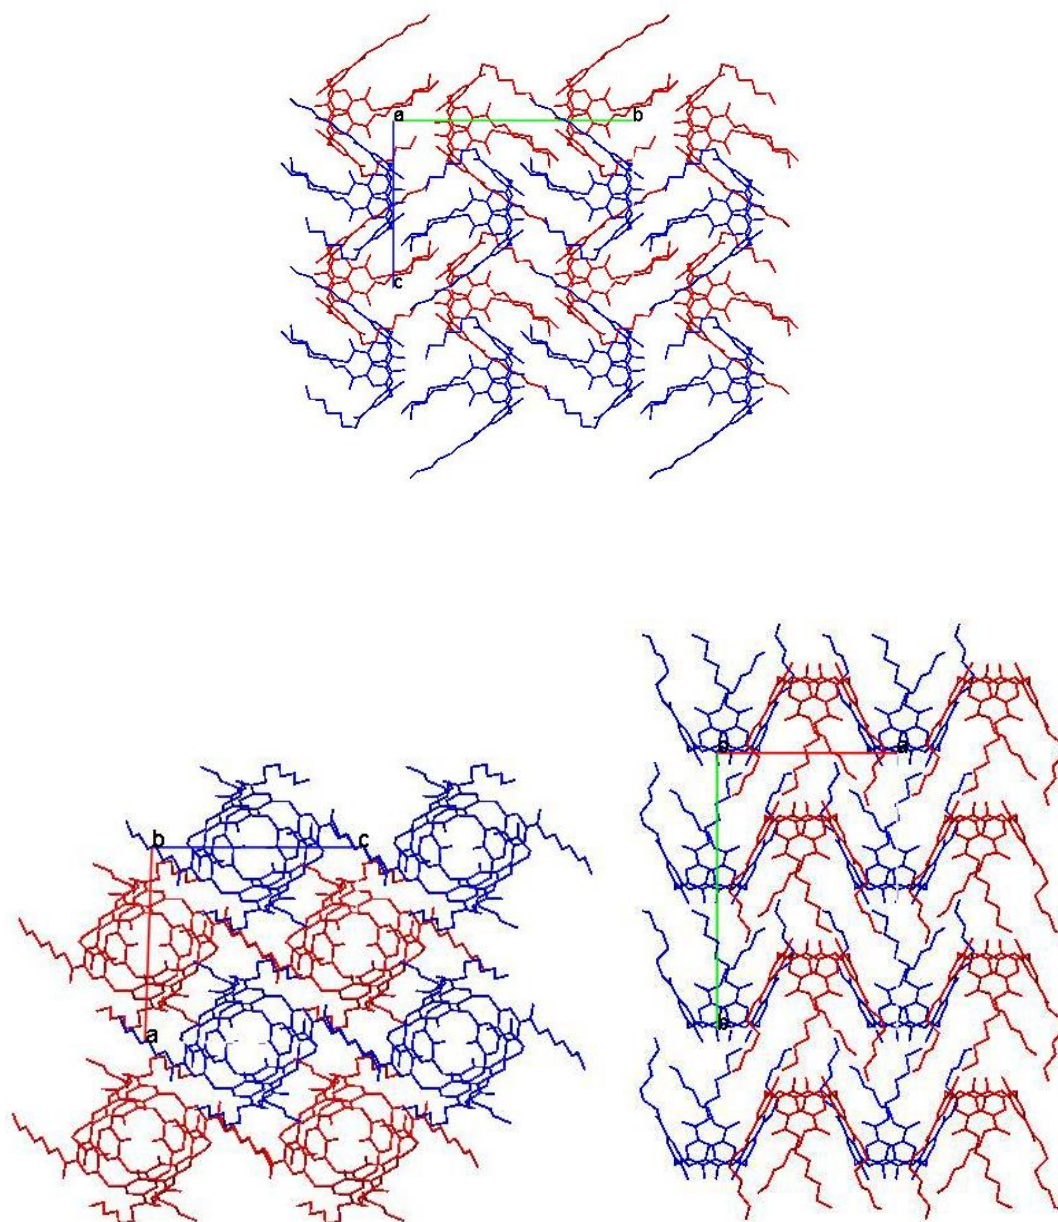

**Fig. S4**

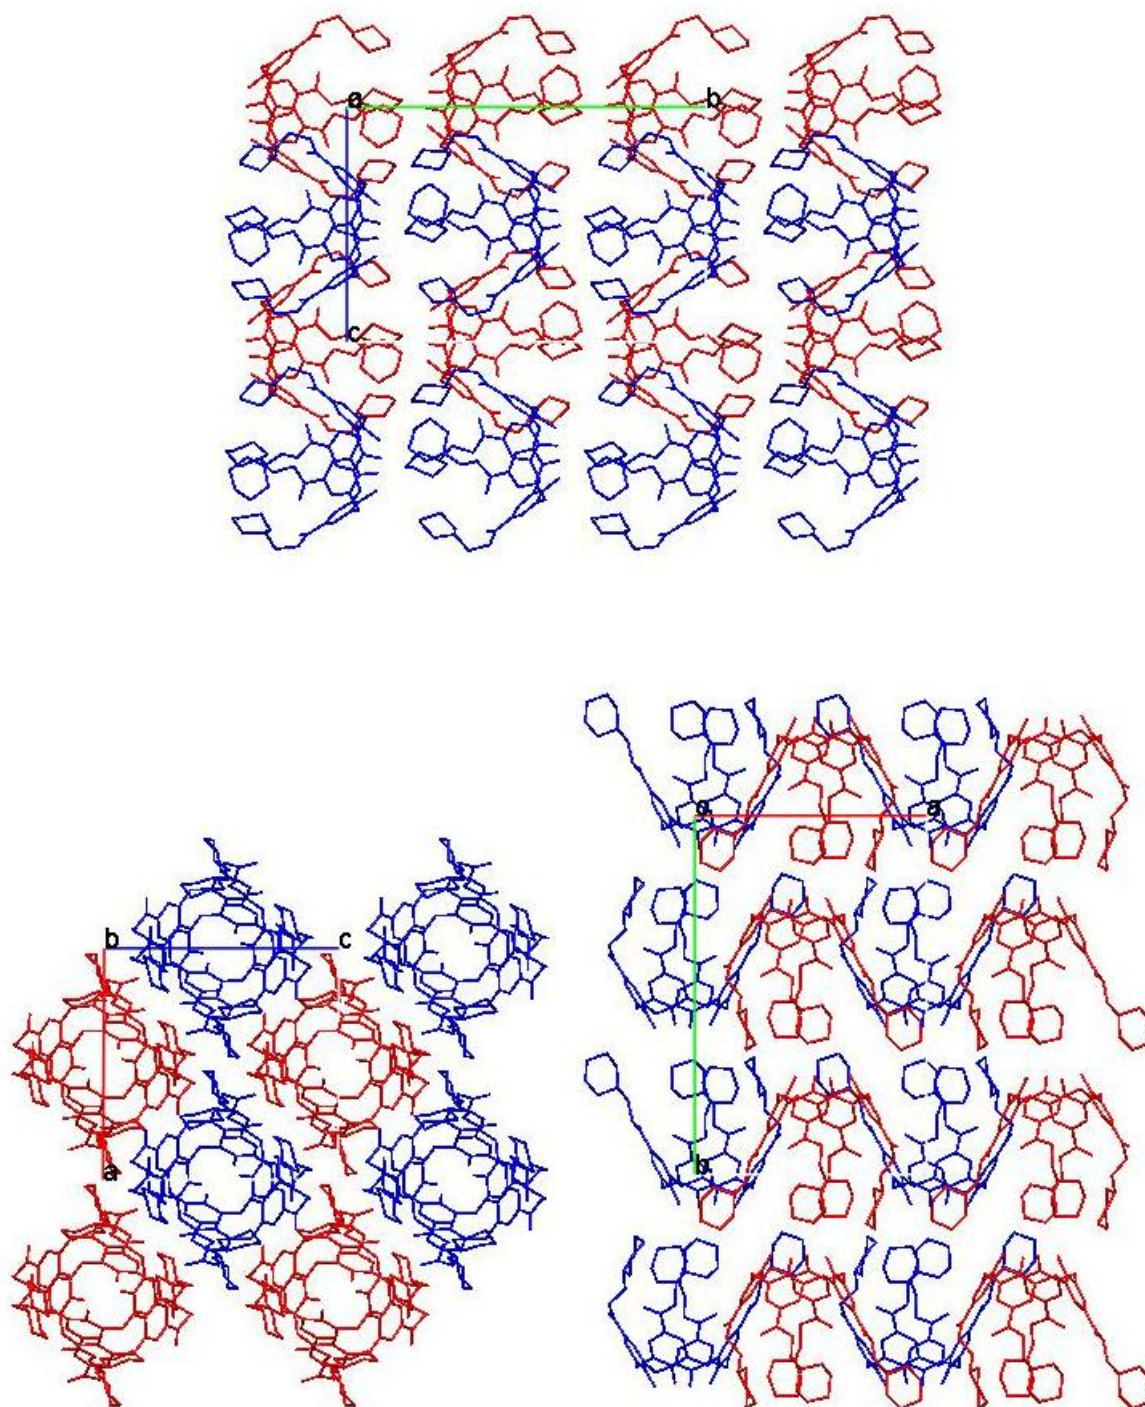

Fig. S5

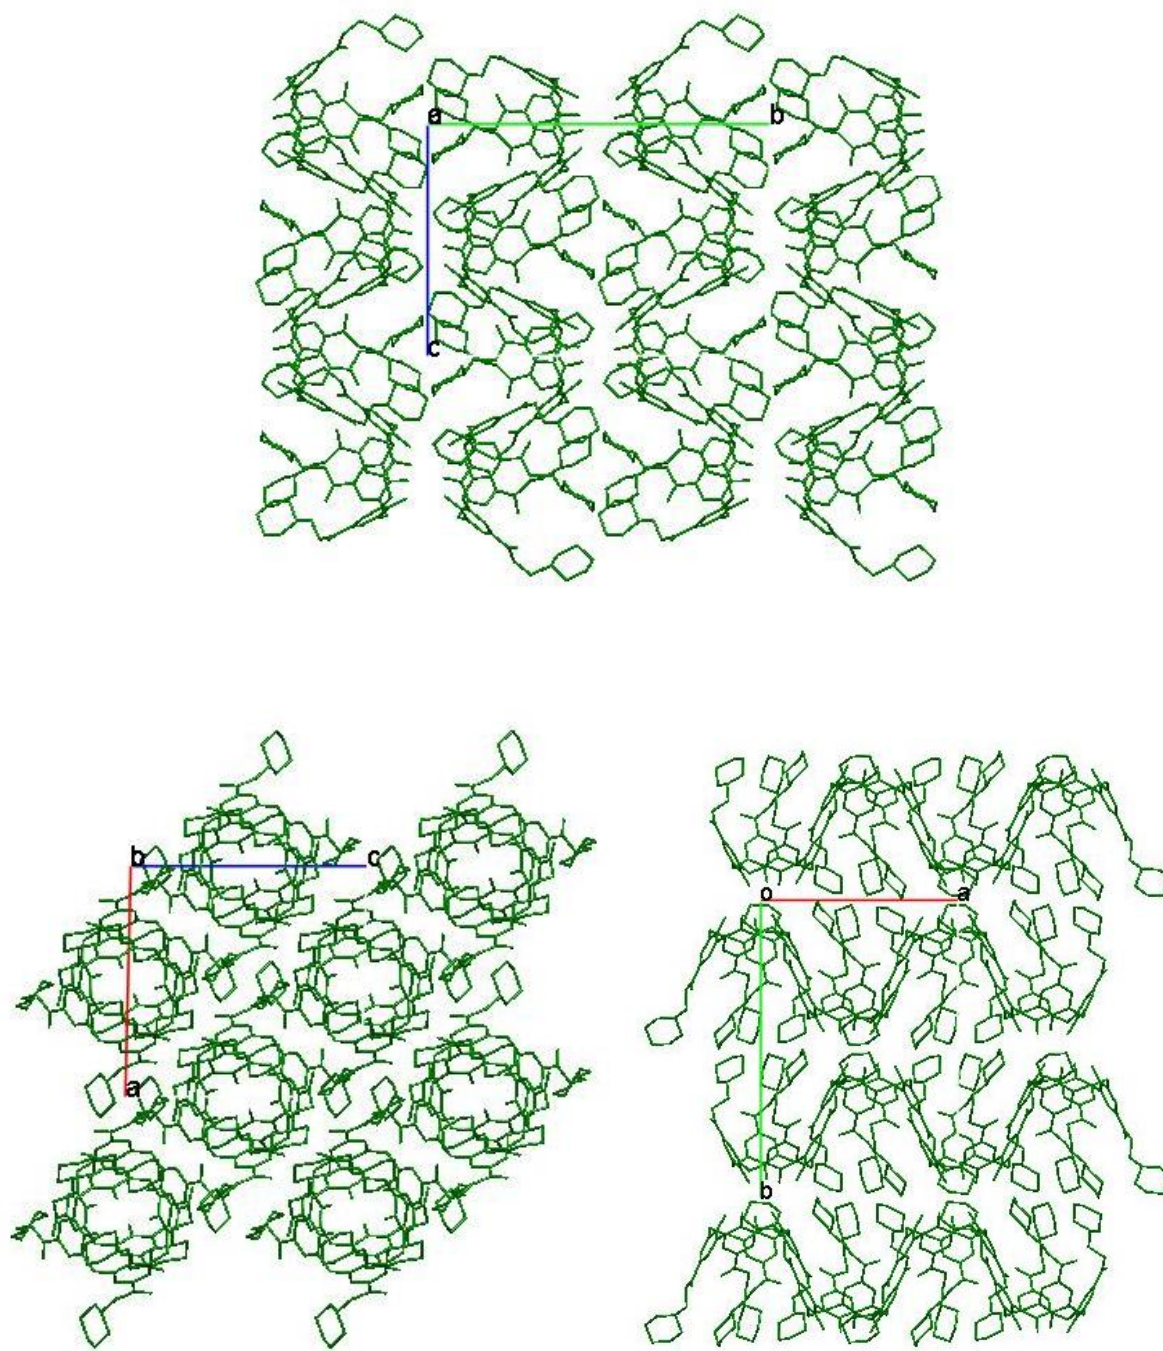

**Fig. S6**
